# Supplementary material for: Screening System of Cannabis sativa Extracts Based on Their Mitochondrial Safety Profile Using Cytochrome c Oxidase Activity as a Biomarker
Source: MDPI journal article supplement (doi:10.3390/ijms24021315), 2023-01-10
Supplement: s1 [file s1]

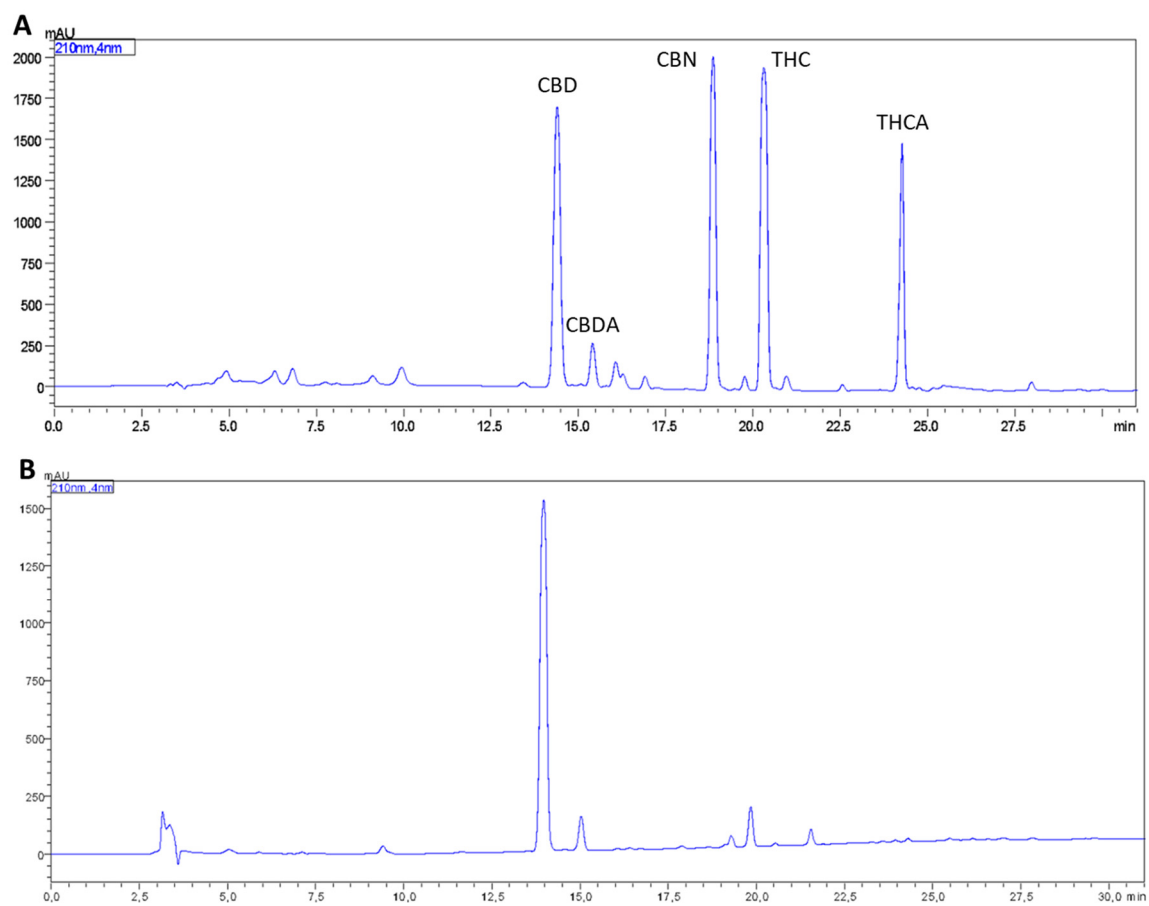

**Figure S1.** Chromatogram of standards (CBD, CBDA, CBN, THC, THCA) (A) and representative chromatogram of the sample N1-5 (B).

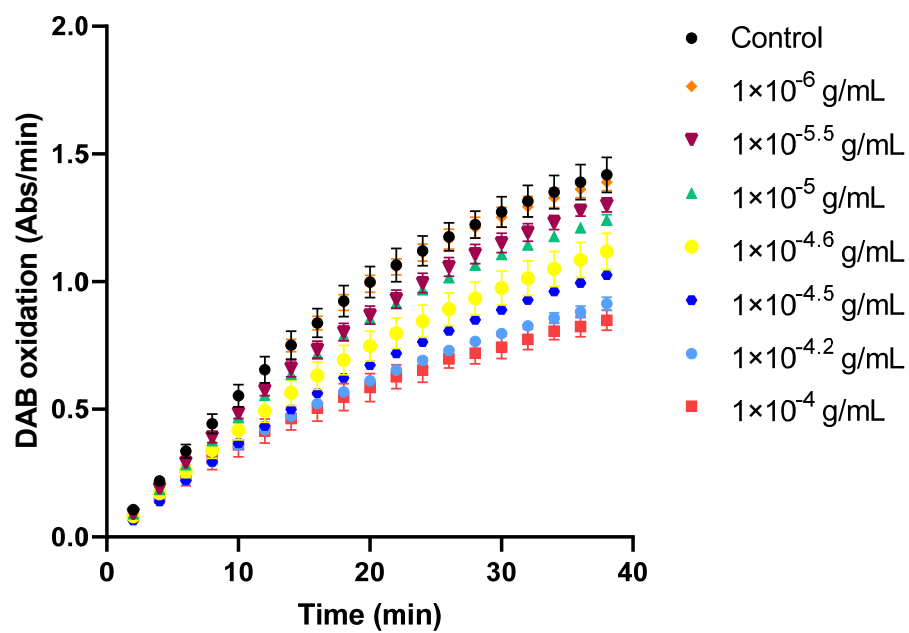

**Figure S2.** Representative graph of the DAB oxidation curves for the range of concentrations of the sample P0-3. Data are mean  $\pm$  SEM values.

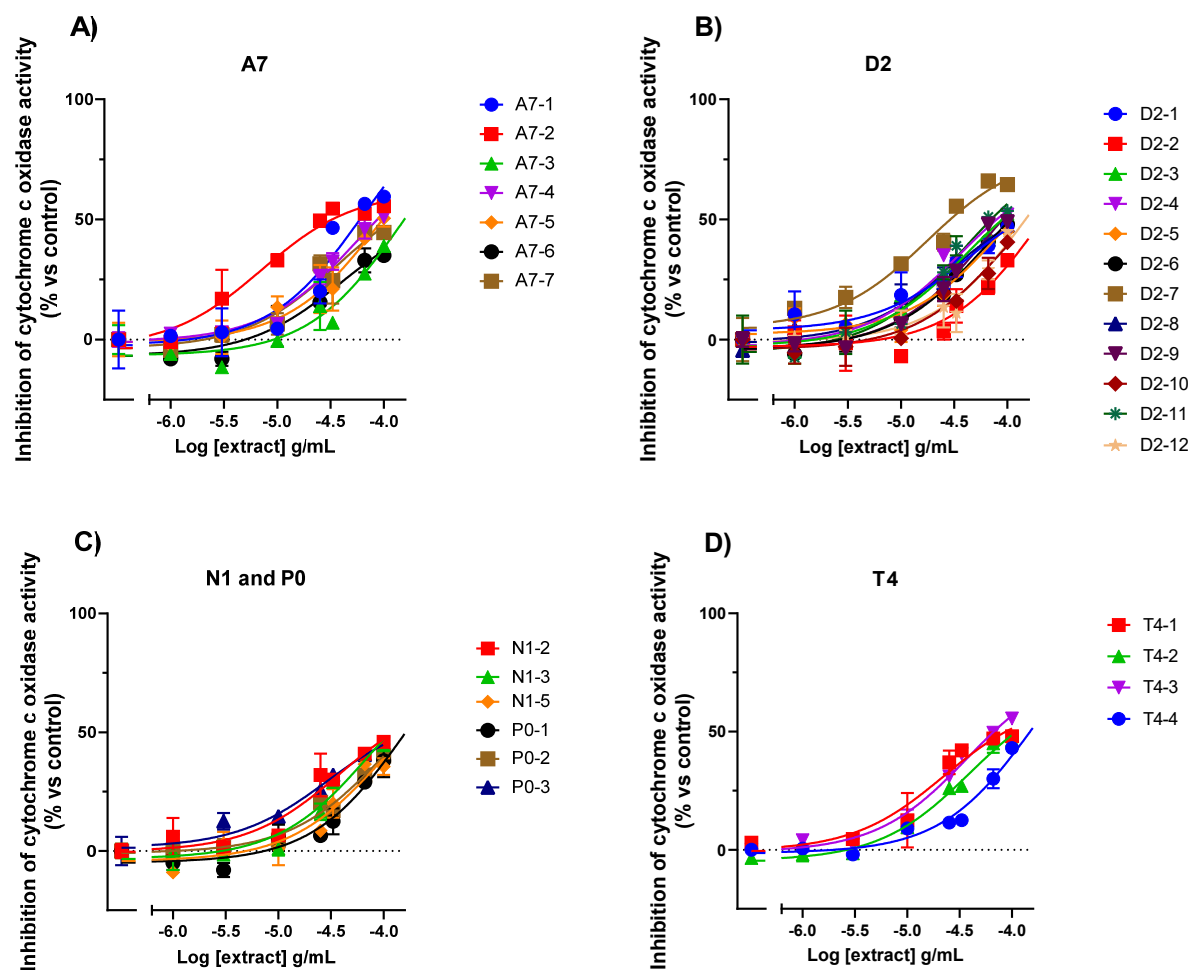

**Figure S3.** The concentration-effect curves of the variety A7 (A), variety D2 (B), varieties N1 and P0 (C), and variety T4 (D) on the CCO activity expressed as a percentage over the control. Data are mean  $\pm$  SEM values.

**Table S1.** Chemical composition of the *Cannabis sativa* varieties analyzed ( $\mu\text{g}/\mu\text{g}$  extract) and Log EC50 $\pm$ SEM obtained in the CCO activity study. Samples within variety are clones obtained from the same mother plant.

| Variety | Sample | Log EC50 $\pm$ SEM | CBD   | CBDA   | THC    | THCA   |
|---------|--------|--------------------|-------|--------|--------|--------|
| A7      | A7-1   | -4.21 $\pm$ 0.27   | 0.568 | 0.1061 | 0.075  | 0.011  |
|         | A7-2   | -5.15 $\pm$ 0.14   | 0.576 | 0.075  | 0.072  | 0.011  |
|         | A7-3   |                    | 0.586 | 0.045  | 0.073  | 0.011  |
|         | A7-4   | -4.26 $\pm$ 0.13   | 0.594 | 0.033  | 0.066  | 0.01   |
|         | A7-5   | -4.03 $\pm$ 0.32   | 0.588 | 0.09   | 0.074  | 0.008  |
|         | A7-6   | -4.40 $\pm$ 0.21   | 0.614 | 0.023  | 0.054  | 0.008  |
|         | A7-7   | -4.44 $\pm$ 0.20   | 0.66  | 0.025  | 0.063  | 0.008  |
| D2      | D2-1   | -4.38 $\pm$ 0.28   | 0.65  | 0.057  | 0.063  | 0.001  |
|         | D2-2   |                    | 0.601 | 0.01   | 0.0563 | 0.002  |
|         | D2-3   | -4.38 $\pm$ 0.12   | 0.628 | 0.015  | 0.0703 | 0      |
|         | D2-4   | -4.44 $\pm$ 0.11   | 0.597 | 0.01   | 0.074  | 0.003  |
|         | D2-5   | -4.05 $\pm$ 0.26   | 0.582 | 0.026  | 0.07   | 0.002  |
|         | D2-6   | -4.21 $\pm$ 0.13   | 0.696 | 0.018  | 0.062  | 0.004  |
|         | D2-7   | -4.75 $\pm$ 0.14   | 0.612 | 0.015  | 0.089  | 0.004  |
|         | D2-8   | -4.50 $\pm$ 0.15   | 0.655 | 0.019  | 0.074  | 0.001  |
|         | D2-9   | -4.20 $\pm$ 0.14   | 0.651 | 0.013  | 0.08   | 0.001  |
|         | D2-10  | -4.01 $\pm$ 0.32   | 0.66  | 0.012  | 0.064  | 0.007  |
|         | D2-11  | -4.41 $\pm$ 0.19   | 0.668 | 0.004  | 0.072  | 0.001  |
|         | D2-12  |                    | 0.659 | 0.054  | 0.062  | 0.001  |
| N1      | N1-2   | -4.42 $\pm$ 0.22   | 0.66  | 0.04   | 0.071  | 0.0054 |
|         | N1-3   | -4.13 $\pm$ 0.22   | 0.61  | 0.055  | 0.0775 | 0.0045 |
|         | N1-5   | -4.04 $\pm$ 0.34   | 0.634 | 0.047  | 0.0462 | 0.0021 |
| P0      | P0-1   |                    | 0.6   | 0.025  | 0.046  | 0.007  |
|         | P0-2   | -4.04 $\pm$ 0.17   | 0.649 | 0.0421 | 0.05   | 0.007  |
|         | P0-3   | -4.54 $\pm$ 0.17   | 0.642 | 0.0193 | 0.062  | 0.01   |
| T4      | T4-1   | -4.55 $\pm$ 0.27   | 0.63  | 0.024  | 0.086  | 0.008  |
|         | T4-2   | -4.40 $\pm$ 0.10   | 0.621 | 0.066  | 0.073  | 0.008  |
|         | T4-3   | -4.43 $\pm$ 0.10   | 0.631 | 0.068  | 0.063  | 0.003  |
|         | T4-4   |                    | 0.613 | 0.045  | 0.067  | 0.005  |

**Table S2.** Extraction yield expressed as % plant dry weight

| Variety | Sample | % Yield |
|---------|--------|---------|
| A7      | A7-1   | 29.78   |
|         | A7-2   | 31.57   |
|         | A7-3   | 41.04   |
|         | A7-4   | 36.40   |
|         | A7-5   | 31.98   |
|         | A7-6   | 26.08   |
|         | A7-7   | 26.34   |
| D2      | D2-1   | 25.30   |
|         | D2-2   | 40.18   |
|         | D2-3   | 26.54   |
|         | D2-4   | 32.74   |
|         | D2-5   | 32.31   |
|         | D2-6   | 29.88   |
|         | D2-7   | 28.94   |
|         | D2-8   | 29.32   |
|         | D2-9   | 28.58   |
|         | D2-10  | 36.32   |
|         | D2-11  | 27.90   |
|         | D2-12  | 29.43   |
| N1      | N1-1   | 29.23   |
|         | N1-2   | 26.72   |
|         | N1-3   | 28.45   |
|         | N1-4   | 29.82   |
|         | N1-5   | 23.20   |
| P0      | P0-1   | 26.05   |
|         | P0-2   | 29.54   |
|         | P0-3   | 21.05   |
| T4      | T4-1   | 26.70   |
|         | T4-2   | 32.20   |
|         | T4-3   | 29.71   |
|         | T4-4   | 32.32   |
